# Supplementary material
Source: publisher figshare collection journal article supplement (https://acs.figshare.com/ndownloader/files/9335371)
Supplement: Supplementary file 1 [file 9335371]

# Supporting Information

**Confined Catalysis in the  $g\text{-C}_3\text{N}_4/\text{Pt}(111)$  Interface: Feasible Molecule  
Intercalation, Tunable Molecule-Metal Interaction and Enhanced Reaction  
Activity of CO Oxidation**

*Shujiao Wang, Yingxin Feng, Ming'an Yu, Qiang Wan and Sen Lin\**

*State Key Laboratory of Photocatalysis on Energy and Environment, College of Chemistry,  
Fuzhou University, Fuzhou 350002, China*

---

*\*Corresponding author. Address: Research Institute of Photocatalysis, Fuzhou University,  
Fuzhou 350002, China. Phone: +86-591-83969175. Email: [slin@fzu.edu.cn](mailto:slin@fzu.edu.cn)*

**Table S1** Calculated adsorption energies of CO, O<sub>2</sub>, O, and CO<sub>2</sub> on Pt(111) surface with and without *g*-C<sub>3</sub>N<sub>4</sub> cover.

| Species         | Adsorption sites | adsorption energy (eV) |
|-----------------|------------------|------------------------|
| CO              | pore-fcc         | -1.50                  |
|                 | pore-hcp         | -1.40                  |
|                 | pore-top         | -1.09                  |
|                 | fcc              | -1.40                  |
|                 | hcp              | -1.36                  |
|                 | top              | -1.05                  |
|                 | Pt(111)-fcc      | -1.84                  |
|                 | Pt(111)-hcp      | -1.83                  |
|                 | Pt(111)-top      | -1.66                  |
| O <sub>2</sub>  | pore-fcc         | -0.82                  |
|                 | pore-hcp         | -0.71                  |
|                 | fcc              | -0.75                  |
|                 | hcp              | -0.60                  |
|                 | Pt(111)-fcc      | -0.93                  |
|                 | Pt(111)-hcp      | -0.84                  |
|                 | surface          | 0.67                   |
| O               | pore-fcc         | -1.37                  |
|                 | pore-hcp         | -1.03                  |
|                 | fcc              | -1.41                  |
|                 | hcp              | -0.94                  |
|                 | Pt(111)-fcc      | -1.39                  |
|                 | Pt(111)-hcp      | -1.03                  |
| CO <sub>2</sub> | bent             | 0.45                   |
|                 | bent-pore        | 0.52                   |
|                 | linear           | 0.38                   |
|                 | linear-pore      | 0.15                   |
|                 | bent-Pt (111)    | 0.05                   |
|                 | linear-Pt(111)   | -0.48                  |

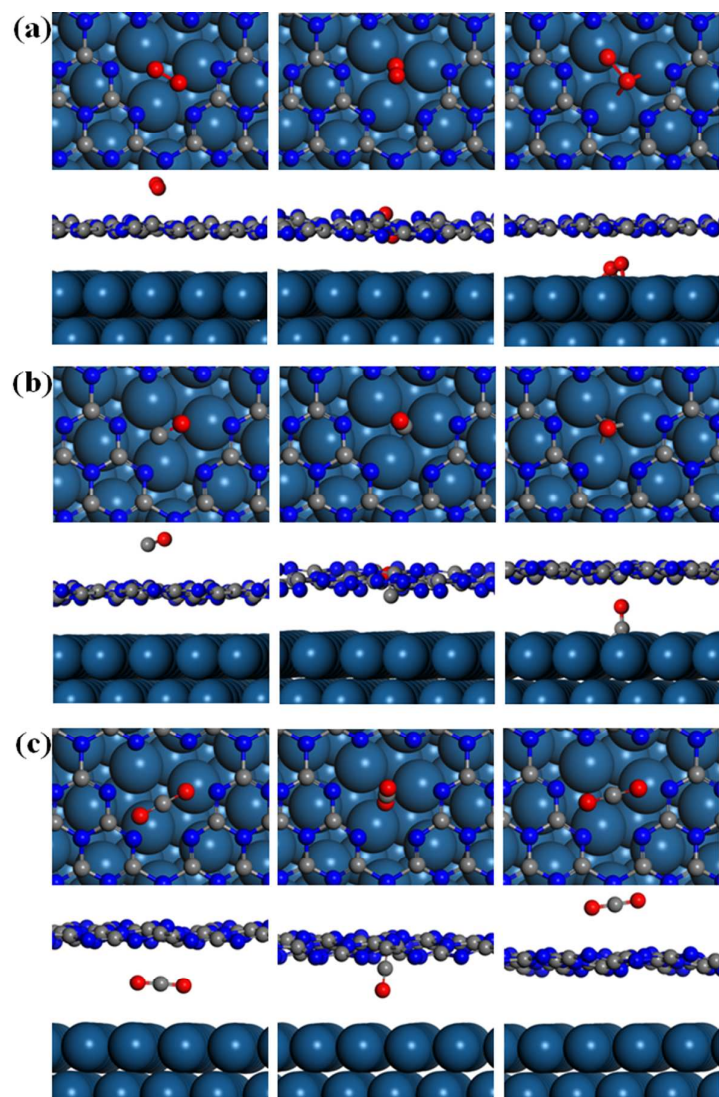

**Fig. S1** Geometries of initial state (IS), transition state (TS) and final state (FS) of O<sub>2</sub> (a), CO (b) and CO<sub>2</sub> (c) intercalation at the g-C<sub>3</sub>N<sub>4</sub>/Pt(111) interface. Color scheme: C, grey; N, blue; O, red; Pt, indigo.

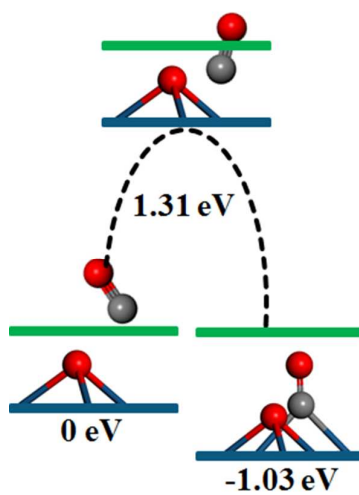

**Fig. S2** Diagrams of initial state (IS), transition state (TS) and final state (FS) CO intercalation at the  $g\text{-C}_3\text{N}_4/\text{Pt}(111)$  interface in the presence of adsorbed atomic oxygen. The green and blue bars are used to represent  $g\text{-C}_3\text{N}_4$  and Pt(111), respectively. Color scheme: C, grey; O, red.

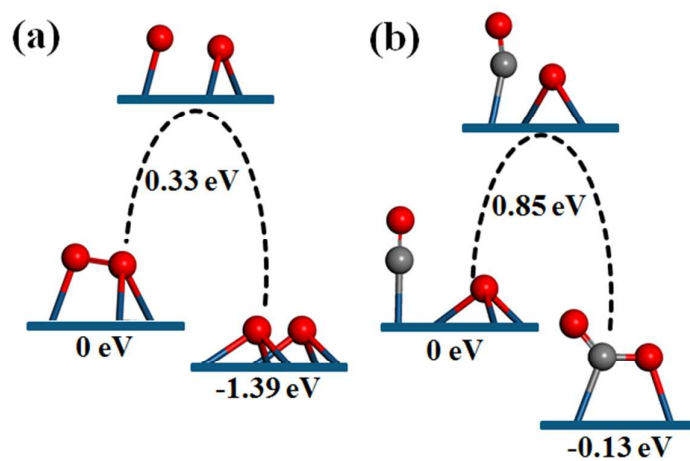

**Fig. S3** Diagrams of IS, TS and FS for O<sub>2</sub> dissociation (a) and CO oxidation (b) on the Pt (111). The blue bars are used to represent Pt(111). Color scheme: C, grey; O, red.

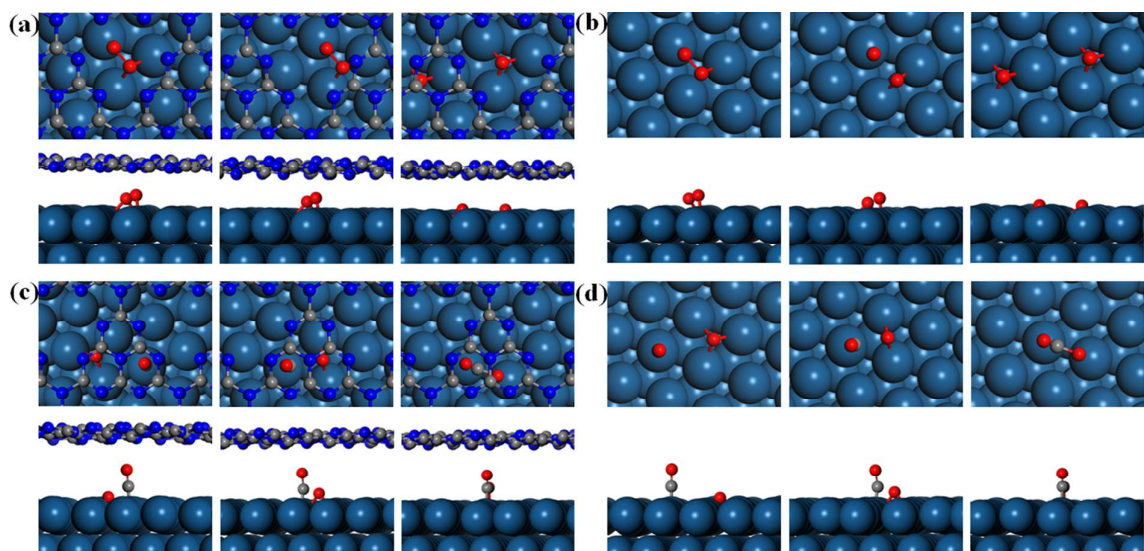

**Fig. S4** Geometries of IS, TS and FS for O<sub>2</sub> dissociation and CO oxidation at the *g*-C<sub>3</sub>N<sub>4</sub>/Pt (111) interface (a and c) and on the pure Pt(111) surface (b and d). Color scheme: C, grey; N, blue; O, red; Pt, indigo.

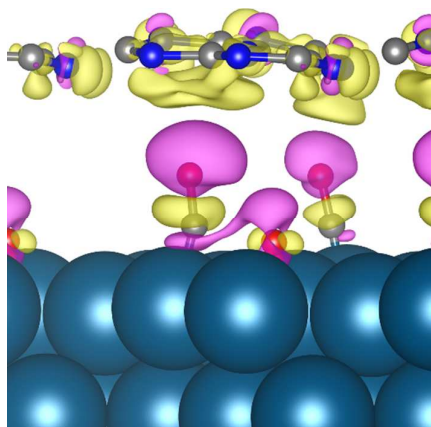

**Fig. S5** Calculated differential charge density of TS for CO oxidation at the *g*-C<sub>3</sub>N<sub>4</sub>/Pt(111) interface in the presence of an adsorbed CO molecule. Yellow and purple represent charge depletion and accumulation, respectively. Color scheme: C, grey; N, blue; O, red; Pt, indigo.
